# Supplementary material for: SWI/SNF complex alterations as a biomarker of immunotherapy efficacy in pancreatic cancer
Source: PubMed Central journal article supplement (PMC8492298; doi:10.1172/jci.insight.150453), 2021-09-22

## ICMJE DISCLOSURE FORM

**Date:** 6/13/2021

**Your Name:** Gregory Botta, MD/PhD

**Manuscript Title:** Tumor Sequencing Identifies SWI/SNF Complex Alterations as a Biomarker of Immunotherapy Efficacy in Pancreatic Cancer

**Manuscript number:** 150453-INS-CMED-RV-2

In the interest of transparency, we ask you to disclose all relationships/activities/interests listed below that are related to the content of your manuscript. "Related" means any relation with for-profit or not-for-profit third parties whose interests may be affected by the content of the manuscript. Disclosure represents a commitment to transparency and does not necessarily indicate a bias. If you are in doubt about whether to list a relationship/activity/interest, it is preferable that you do so.

The following questions apply to the author's relationships/activities/interests as they relate to the current manuscript only.

The author's relationships/activities/interests should be defined broadly. For example, if your manuscript pertains to the epidemiology of hypertension, you should declare all relationships with manufacturers of antihypertensive medication, even if that medication is not mentioned in the manuscript.

In item #1 below, report all support for the work reported in this manuscript without time limit. For all other items, the time frame for disclosure is the past 36 months.

|                                                           |                                                                                                                                                                                | Name all entities with whom you have this relationship or indicate none (add rows as needed) | Specifications/Comments (e.g., if payments were made to you or to your institution) |
|-----------------------------------------------------------|--------------------------------------------------------------------------------------------------------------------------------------------------------------------------------|----------------------------------------------------------------------------------------------|-------------------------------------------------------------------------------------|
| <b>Time frame: Since the initial planning of the work</b> |                                                                                                                                                                                |                                                                                              |                                                                                     |
| 1                                                         | All support for the present manuscript (e.g., funding, provision of study materials, medical writing, article processing charges, etc.)<br><b>No time limit for this item.</b> | ___ None                                                                                     |                                                                                     |
|                                                           |                                                                                                                                                                                | NIH/NCI                                                                                      | LRP KYGF9753                                                                        |
|                                                           |                                                                                                                                                                                |                                                                                              |                                                                                     |
|                                                           |                                                                                                                                                                                |                                                                                              |                                                                                     |
|                                                           |                                                                                                                                                                                |                                                                                              |                                                                                     |
|                                                           |                                                                                                                                                                                |                                                                                              |                                                                                     |
| <b>Time frame: past 36 months</b>                         |                                                                                                                                                                                |                                                                                              |                                                                                     |
| 2                                                         | Grants or contracts from any entity (if not indicated in item #1 above).                                                                                                       | __X__ None                                                                                   |                                                                                     |
|                                                           |                                                                                                                                                                                |                                                                                              |                                                                                     |
| 3                                                         | Royalties or licenses                                                                                                                                                          | __X__ None                                                                                   |                                                                                     |
|                                                           |                                                                                                                                                                                |                                                                                              |                                                                                     |

|    |                                                                                                              |                                          |                         |
|----|--------------------------------------------------------------------------------------------------------------|------------------------------------------|-------------------------|
| 4  | Consulting fees                                                                                              | ___ None                                 |                         |
|    |                                                                                                              | Natera                                   | Payments for consulting |
|    |                                                                                                              |                                          |                         |
| 5  | Payment or honoraria for lectures, presentations, speakers bureaus, manuscript writing or educational events | ___ None                                 |                         |
|    |                                                                                                              | Natera                                   | Payments for speaking   |
|    |                                                                                                              |                                          |                         |
| 6  | Payment for expert testimony                                                                                 | <input checked="" type="checkbox"/> None |                         |
|    |                                                                                                              |                                          |                         |
|    |                                                                                                              |                                          |                         |
| 7  | Support for attending meetings and/or travel                                                                 | <input checked="" type="checkbox"/> None |                         |
|    |                                                                                                              |                                          |                         |
|    |                                                                                                              |                                          |                         |
| 8  | Patents planned, issued or pending                                                                           | <input checked="" type="checkbox"/> None |                         |
|    |                                                                                                              |                                          |                         |
|    |                                                                                                              |                                          |                         |
| 9  | Participation on a Data Safety Monitoring Board or Advisory Board                                            | <input checked="" type="checkbox"/> None |                         |
|    |                                                                                                              |                                          |                         |
|    |                                                                                                              |                                          |                         |
| 10 | Leadership or fiduciary role in other board, society, committee or advocacy group, paid or unpaid            | <input checked="" type="checkbox"/> None |                         |
|    |                                                                                                              |                                          |                         |
|    |                                                                                                              |                                          |                         |
| 11 | Stock or stock options                                                                                       | <input checked="" type="checkbox"/> None |                         |
|    |                                                                                                              |                                          |                         |
|    |                                                                                                              |                                          |                         |
| 12 | Receipt of equipment, materials, drugs, medical writing, gifts or other services                             | <input checked="" type="checkbox"/> None |                         |
|    |                                                                                                              |                                          |                         |
|    |                                                                                                              |                                          |                         |
| 13 | Other financial or non-financial interests                                                                   | ___ None                                 |                         |
|    |                                                                                                              | CEND Therapeutics                        | Consulting              |
|    |                                                                                                              | TumorGen Inc                             | Consulting              |

Please place an "X" next to the following statement to indicate your agreement:

I certify that I have answered every question and have not altered the wording of any of the questions on this form.



## ICMJE DISCLOSURE FORM

**Date:** 6/13/2021

**Your Name:** Shumei Kato, MD

**Manuscript Title:** Tumor Sequencing Identifies SWI/SNF Complex Alterations as a Biomarker of Immunotherapy Efficacy in Pancreatic Cancer

**Manuscript number:** 150453-INS-CMED-RV-2

In the interest of transparency, we ask you to disclose all relationships/activities/interests listed below that are related to the content of your manuscript. "Related" means any relation with for-profit or not-for-profit third parties whose interests may be affected by the content of the manuscript. Disclosure represents a commitment to transparency and does not necessarily indicate a bias. If you are in doubt about whether to list a relationship/activity/interest, it is preferable that you do so.

The following questions apply to the author's relationships/activities/interests as they relate to the current manuscript only.

The author's relationships/activities/interests should be defined broadly. For example, if your manuscript pertains to the epidemiology of hypertension, you should declare all relationships with manufacturers of antihypertensive medication, even if that medication is not mentioned in the manuscript.

In item #1 below, report all support for the work reported in this manuscript without time limit. For all other items, the time frame for disclosure is the past 36 months.

|                                                           |                                                                                                                                                                                | Name all entities with whom you have this relationship or indicate none (add rows as needed) | Specifications/Comments (e.g., if payments were made to you or to your institution) |
|-----------------------------------------------------------|--------------------------------------------------------------------------------------------------------------------------------------------------------------------------------|----------------------------------------------------------------------------------------------|-------------------------------------------------------------------------------------|
| <b>Time frame: Since the initial planning of the work</b> |                                                                                                                                                                                |                                                                                              |                                                                                     |
| 1                                                         | All support for the present manuscript (e.g., funding, provision of study materials, medical writing, article processing charges, etc.)<br><b>No time limit for this item.</b> | __X__ None                                                                                   |                                                                                     |
|                                                           |                                                                                                                                                                                |                                                                                              |                                                                                     |
|                                                           |                                                                                                                                                                                |                                                                                              |                                                                                     |
|                                                           |                                                                                                                                                                                |                                                                                              |                                                                                     |
|                                                           |                                                                                                                                                                                |                                                                                              |                                                                                     |
|                                                           |                                                                                                                                                                                |                                                                                              |                                                                                     |
|                                                           |                                                                                                                                                                                |                                                                                              |                                                                                     |
| <b>Time frame: past 36 months</b>                         |                                                                                                                                                                                |                                                                                              |                                                                                     |
| 2                                                         | Grants or contracts from any entity (if not indicated in item #1 above).                                                                                                       | ___ None                                                                                     |                                                                                     |
|                                                           |                                                                                                                                                                                | ACT Genomics, Sysmex                                                                         | Research Funding                                                                    |
|                                                           |                                                                                                                                                                                | Konica Minolta, Omniseq                                                                      | Research Funding                                                                    |
| 3                                                         | Royalties or licenses                                                                                                                                                          | __X__ None                                                                                   |                                                                                     |
|                                                           |                                                                                                                                                                                |                                                                                              |                                                                                     |
|                                                           |                                                                                                                                                                                |                                                                                              |                                                                                     |

|    |                                                                                                              |                                          |                         |
|----|--------------------------------------------------------------------------------------------------------------|------------------------------------------|-------------------------|
| 4  | Consulting fees                                                                                              | ___ None                                 |                         |
|    |                                                                                                              | Foundation Medicine                      | Payments for consulting |
|    |                                                                                                              |                                          |                         |
| 5  | Payment or honoraria for lectures, presentations, speakers bureaus, manuscript writing or educational events | ___ None                                 |                         |
|    |                                                                                                              | Roche                                    | Payments for speaking   |
|    |                                                                                                              |                                          |                         |
| 6  | Payment for expert testimony                                                                                 | <input checked="" type="checkbox"/> None |                         |
|    |                                                                                                              |                                          |                         |
|    |                                                                                                              |                                          |                         |
| 7  | Support for attending meetings and/or travel                                                                 | <input checked="" type="checkbox"/> None |                         |
|    |                                                                                                              |                                          |                         |
|    |                                                                                                              |                                          |                         |
| 8  | Patents planned, issued or pending                                                                           | <input checked="" type="checkbox"/> None |                         |
|    |                                                                                                              |                                          |                         |
|    |                                                                                                              |                                          |                         |
| 9  | Participation on a Data Safety Monitoring Board or Advisory Board                                            | <input checked="" type="checkbox"/> None |                         |
|    |                                                                                                              |                                          |                         |
|    |                                                                                                              |                                          |                         |
| 10 | Leadership or fiduciary role in other board, society, committee or advocacy group, paid or unpaid            | <input checked="" type="checkbox"/> None |                         |
|    |                                                                                                              |                                          |                         |
|    |                                                                                                              |                                          |                         |
| 11 | Stock or stock options                                                                                       | <input checked="" type="checkbox"/> None |                         |
|    |                                                                                                              |                                          |                         |
|    |                                                                                                              |                                          |                         |
| 12 | Receipt of equipment, materials, drugs, medical writing, gifts or other services                             | <input checked="" type="checkbox"/> None |                         |
|    |                                                                                                              |                                          |                         |
|    |                                                                                                              |                                          |                         |
| 13 | Other financial or non-financial interests                                                                   | ___ None                                 |                         |
|    |                                                                                                              |                                          |                         |
|    |                                                                                                              |                                          |                         |

Please place an "X" next to the following statement to indicate your agreement:

I certify that I have answered every question and have not altered the wording of any of the questions on this form.



## ICMJE DISCLOSURE FORM

**Date:** 6/13/2021

**Your Name:** Razelle Kurzrock, MD

**Manuscript Title:** Tumor Sequencing Identifies SWI/SNF Complex Alterations as a Biomarker of Immunotherapy Efficacy in Pancreatic Cancer

**Manuscript number:** 150453-INS-CMED-RV-2

In the interest of transparency, we ask you to disclose all relationships/activities/interests listed below that are related to the content of your manuscript. "Related" means any relation with for-profit or not-for-profit third parties whose interests may be affected by the content of the manuscript. Disclosure represents a commitment to transparency and does not necessarily indicate a bias. If you are in doubt about whether to list a relationship/activity/interest, it is preferable that you do so.

The following questions apply to the author's relationships/activities/interests as they relate to the current manuscript only.

The author's relationships/activities/interests should be defined broadly. For example, if your manuscript pertains to the epidemiology of hypertension, you should declare all relationships with manufacturers of antihypertensive medication, even if that medication is not mentioned in the manuscript.

In item #1 below, report all support for the work reported in this manuscript without time limit. For all other items, the time frame for disclosure is the past 36 months.

|                                                           |                                                                                                                                                                                | Name all entities with whom you have this relationship or indicate none (add rows as needed) | Specifications/Comments (e.g., if payments were made to you or to your institution) |
|-----------------------------------------------------------|--------------------------------------------------------------------------------------------------------------------------------------------------------------------------------|----------------------------------------------------------------------------------------------|-------------------------------------------------------------------------------------|
| <b>Time frame: Since the initial planning of the work</b> |                                                                                                                                                                                |                                                                                              |                                                                                     |
| 1                                                         | All support for the present manuscript (e.g., funding, provision of study materials, medical writing, article processing charges, etc.)<br><b>No time limit for this item.</b> | ___ None                                                                                     |                                                                                     |
|                                                           |                                                                                                                                                                                | Incyte, Genentech                                                                            | Research funding                                                                    |
|                                                           |                                                                                                                                                                                | Merck Serono, Pfizer                                                                         | Research funding                                                                    |
|                                                           |                                                                                                                                                                                | Sequenom, Foundation                                                                         | Research funding                                                                    |
|                                                           |                                                                                                                                                                                | Guardant, Grifols                                                                            | Research funding                                                                    |
|                                                           |                                                                                                                                                                                | Konica Miolta                                                                                | Research funding                                                                    |
| <b>Time frame: past 36 months</b>                         |                                                                                                                                                                                |                                                                                              |                                                                                     |
| 2                                                         | Grants or contracts from any entity (if not indicated in item #1 above).                                                                                                       | ___ None                                                                                     |                                                                                     |
|                                                           |                                                                                                                                                                                | NIH/NCI                                                                                      | P30 CA023100                                                                        |
|                                                           |                                                                                                                                                                                | Joan and Irwin Jacobs Fund                                                                   |                                                                                     |
| 3                                                         | Royalties or licenses                                                                                                                                                          | __X__ None                                                                                   |                                                                                     |
|                                                           |                                                                                                                                                                                |                                                                                              |                                                                                     |

|    |                                                                                                              |                                          |                         |
|----|--------------------------------------------------------------------------------------------------------------|------------------------------------------|-------------------------|
| 4  | Consulting fees                                                                                              | <input type="checkbox"/> None            |                         |
|    |                                                                                                              | LOXO, X-Biotech                          | Payments for consulting |
|    |                                                                                                              | Actuate, Genentech, Roche, Neomed        | Payments for consulting |
| 5  | Payment or honoraria for lectures, presentations, speakers bureaus, manuscript writing or educational events | <input type="checkbox"/> None            |                         |
|    |                                                                                                              | Roche                                    | Payments for speaking   |
| 6  | Payment for expert testimony                                                                                 | <input checked="" type="checkbox"/> None |                         |
| 7  | Support for attending meetings and/or travel                                                                 | <input checked="" type="checkbox"/> None |                         |
| 8  | Patents planned, issued or pending                                                                           | <input checked="" type="checkbox"/> None |                         |
| 9  | Participation on a Data Safety Monitoring Board or Advisory Board                                            | <input checked="" type="checkbox"/> None |                         |
| 10 | Leadership or fiduciary role in other board, society, committee or advocacy group, paid or unpaid            | <input type="checkbox"/> None            |                         |
|    |                                                                                                              | CureMatch, CureMetrix                    | Founder, Board Member   |
| 11 | Stock or stock options                                                                                       | <input type="checkbox"/> None            |                         |
|    |                                                                                                              | IDbyDNA                                  | Equity Interest         |
|    |                                                                                                              | CureMatch                                | Equity Interest         |
| 12 | Receipt of equipment, materials, drugs, medical writing, gifts or other services                             | <input checked="" type="checkbox"/> None |                         |
| 13 | Other financial or non-financial interests                                                                   | <input type="checkbox"/> None            |                         |

Please place an "X" next to the following statement to indicate your agreement:

I certify that I have answered every question and have not altered the wording of any of the questions on this form

*Roelle McL...*

Date: 6/13/2021

Your Name: Hitendra Patel, MD; Paul Fanta, MD; Suzanna Lee, MPH; Ryosuke Okamura, MD/PhD

Manuscript Title: Tumor Sequencing Identifies SWI/SNF Complex Alterations as a Biomarker of Immunotherapy Efficacy in Pancreatic Cancer

Manuscript number: 150453-INS-CMED-RV-2

In the interest of transparency, we ask you to disclose all relationships/activities/interests listed below that are related to the content of your manuscript. "Related" means any relation with for-profit or not-for-profit third parties whose interests may be affected by the content of the manuscript. Disclosure represents a commitment to transparency and does not necessarily indicate a bias. If you are in doubt about whether to list a relationship/activity/interest, it is preferable that you do so.

The following questions apply to the author's relationships/activities/interests as they relate to the current manuscript only.

The author's relationships/activities/interests should be defined broadly. For example, if your manuscript pertains to the epidemiology of hypertension, you should declare all relationships with manufacturers of antihypertensive medication, even if that medication is not mentioned in the manuscript.

In item #1 below, report all support for the work reported in this manuscript without time limit. For all other items, the time frame for disclosure is the past 36 months.

|                                                           |                                                                                                                                                                                | Name all entities with whom you have this relationship or indicate none (add rows as needed) | Specifications/Comments (e.g., if payments were made to you or to your institution) |
|-----------------------------------------------------------|--------------------------------------------------------------------------------------------------------------------------------------------------------------------------------|----------------------------------------------------------------------------------------------|-------------------------------------------------------------------------------------|
| <b>Time frame: Since the initial planning of the work</b> |                                                                                                                                                                                |                                                                                              |                                                                                     |
| 1                                                         | All support for the present manuscript (e.g., funding, provision of study materials, medical writing, article processing charges, etc.)<br><b>No time limit for this item.</b> | <input checked="" type="checkbox"/> None                                                     |                                                                                     |
|                                                           |                                                                                                                                                                                |                                                                                              |                                                                                     |
|                                                           |                                                                                                                                                                                |                                                                                              |                                                                                     |
|                                                           |                                                                                                                                                                                |                                                                                              |                                                                                     |
|                                                           |                                                                                                                                                                                |                                                                                              |                                                                                     |
|                                                           |                                                                                                                                                                                |                                                                                              |                                                                                     |
|                                                           |                                                                                                                                                                                |                                                                                              |                                                                                     |
| <b>Time frame: past 36 months</b>                         |                                                                                                                                                                                |                                                                                              |                                                                                     |
| 2                                                         | Grants or contracts from any entity (if not indicated in item #1 above).                                                                                                       | <input checked="" type="checkbox"/> None                                                     |                                                                                     |
|                                                           |                                                                                                                                                                                |                                                                                              |                                                                                     |
| 3                                                         | Royalties or licenses                                                                                                                                                          | <input checked="" type="checkbox"/> None                                                     |                                                                                     |
|                                                           |                                                                                                                                                                                |                                                                                              |                                                                                     |
| 4                                                         | Consulting fees                                                                                                                                                                | <input checked="" type="checkbox"/> None                                                     |                                                                                     |

|    |                                                                                                              |                                          |  |
|----|--------------------------------------------------------------------------------------------------------------|------------------------------------------|--|
|    |                                                                                                              |                                          |  |
| 5  | Payment or honoraria for lectures, presentations, speakers bureaus, manuscript writing or educational events | <input checked="" type="checkbox"/> None |  |
| 6  | Payment for expert testimony                                                                                 | <input checked="" type="checkbox"/> None |  |
| 7  | Support for attending meetings and/or travel                                                                 | <input checked="" type="checkbox"/> None |  |
| 8  | Patents planned, issued or pending                                                                           | <input checked="" type="checkbox"/> None |  |
| 9  | Participation on a Data Safety Monitoring Board or Advisory Board                                            | <input checked="" type="checkbox"/> None |  |
| 10 | Leadership or fiduciary role in other board, society, committee or advocacy group, paid or unpaid            | <input checked="" type="checkbox"/> None |  |
| 11 | Stock or stock options                                                                                       | <input checked="" type="checkbox"/> None |  |
| 12 | Receipt of equipment, materials, drugs, medical writing, gifts or other services                             | <input checked="" type="checkbox"/> None |  |
| 13 | Other financial or non-financial interests                                                                   | <input checked="" type="checkbox"/> None |  |

Please place an "X" next to the following statement to indicate your agreement:

I certify that I have answered every question and have not altered the wording of any of the questions on this form.






Supplement: jciinsight-6-150453-s260.pdf [file jciinsight-6-150453-s260.pdf]
