# Supplementary material for: SWI/SNF complex alterations as a biomarker of immunotherapy efficacy in pancreatic cancer
Source: PubMed Central journal article supplement (PMC8492298; doi:10.1172/jci.insight.150453), 2021-09-22
Supplement: jciinsight-6-150453-s258.pdf [file jciinsight-6-150453-s258.pdf]

**Supplemental Table 1. Next Generation Sequencing of SWI/SNF Sub-Unit Genes**

| Family       | Gene Name      | Protein Name                                             |
|--------------|----------------|----------------------------------------------------------|
| <i>ARID</i>  |                |                                                          |
|              | <i>ARID1A</i>  | ARID1A                                                   |
|              | <i>ARID1B</i>  | ARID1B                                                   |
|              | <i>ARID2</i>   | ARID2                                                    |
| <i>SMARC</i> |                |                                                          |
|              | <i>SMARCA2</i> | SMARCA2 / Probable global transcription activator SNF2L2 |
|              | <i>SMARCA4</i> | SMARCA4 / Transcription activator BRG1                   |
|              | <i>SMARCB1</i> | SMARCB1                                                  |
|              | <i>SMARCC1</i> | SMARCC1                                                  |
|              | <i>SMARCC2</i> | SMARCC2                                                  |
|              | <i>SMARCD1</i> | SMARCD1                                                  |
|              | <i>SMARCD2</i> | SMARCD2                                                  |
|              | <i>SMARCD3</i> | SMARCD3                                                  |
|              | <i>SMARCE1</i> | SMARCE1                                                  |
| <i>PBRM</i>  |                |                                                          |
|              | <i>PBRM1</i>   | PRBM1                                                    |

**Supplemental Table 2: Characteristics of Four Patients with Pancreatic Cancer Not Harboring SWI/SNF Complex Alterations Receiving Immunotherapy**

| Case # / Age/ Sex | Tissue NGS Vendor | Pertinent Tissue NGS Findings                             | TMB* | Mismatch Repair | Blood NGS Vendor | Pertinent Blood NGS Findings                    | Immune Vendor | PD-L1** | Immune Profile                                                      | # Prior Lines of Therapy | Prior Lines of Therapy                   | Immunotherapy                                        | Best Response | PFS (months) | OS (months) | Comment                                                                                                       |
|-------------------|-------------------|-----------------------------------------------------------|------|-----------------|------------------|-------------------------------------------------|---------------|---------|---------------------------------------------------------------------|--------------------------|------------------------------------------|------------------------------------------------------|---------------|--------------|-------------|---------------------------------------------------------------------------------------------------------------|
| #16<br>62 / M     | Foundation        | KRAS G12V, CDKN2A/B loss exons 2-3, TP53 G244C            | 5    | Proficient      | Guardant         | APC H250D                                       | Foundation    | 0%      | TILs 0%, PD-1 10%                                                   | 2                        | gemcitabine + nab-paclitaxel             | Pembrolizumab                                        | PD            | 2            | 13          | After immunotherapy progression, patient started on 5-FU + liposomal irinotecan followed by gemcitabine alone |
| #17<br>64 / M     | Foundation        | NRAS amplification, CDKN2A p16INK4a G6_A21del, TP53 S215R | ND   | Proficient      | Guardant         | TP53 S215R, MYC amplification, CDKN2A G6_A21del | Caris         | 0%      | PD-1 0%                                                             | 1                        | gemcitabine + nab-paclitaxel + cisplatin | oleclumab + Durvalumab                               | PD            | 1            | 9           | After immunotherapy progression patient started FOLFOX until death                                            |
|                   | Caris             | HER2 negative, TS Positive, TUBB3 Positive                | ND   | Proficient      |                  |                                                 |               |         |                                                                     |                          |                                          |                                                      |               |              |             |                                                                                                               |
| #18<br>75 / F     | Foundation        | KRAS G12D, CDKN2A p16INK4a R29_A34del, TP53 G199V         | 6    | Proficient      | ND               | ND                                              | Omniseq       | 0%      | TILs Low, CD8+ non-infiltrating, PD-L1/L2 copy number not amplified | 1                        | Gemcitabine                              | pembrolizumab                                        | PD            | 2            | 3           | -                                                                                                             |
|                   | Tempus            | TP53 G199V, KRAS G12D                                     | 4.2  | Proficient      |                  |                                                 | Tempus        | 0%      |                                                                     |                          |                                          |                                                      |               |              |             |                                                                                                               |
| #19<br>60 / M     | Foundation        | KRAS G12V, CDKN2A/B loss, SMAD4 loss, TP53 P278S          | 3.51 | Proficient      | ND               | ND                                              | ND            | ND      | ND                                                                  | 0                        | Nothing                                  | pembrolizumab + gemcitabine + nab-paclitaxel + IDO-1 | PD            | 4            | 9           | After immunotherapy progression patient started on 5FU + liposomal irinotecan + IL-alpha inhibitor            |

\* = mutations per megabase (mut/Mb)

\*\* = stratified on the scale: low (0-1%), intermediate (2-49%), high (50%+) using the Dako 22C3 pharmDx qualitative immunohistochemical assay of tumor cells<sup>38</sup>.

\*\*\* = "+" means ongoing response

**Abbreviations:** CR = Complete Response; dMMR = deficient mismatch repair; F = female; HPF = high powered field; IE = Inevaluable; Int. = Intermediate; I/O = Immunotherapy; irAE = immune related adverse event; M = male; ND = Not done; NGS = next generation sequencing; OS = median overall survival; PD-1 = Programmed death receptor-1; PFS = Median Progression Free Survival; pMMR = proficient mismatch repair; PR = partial response; S-1 = tegafur, gimeracil, oteracil; SD = stable disease; TILs = tumor infiltrating leukocytes; TMB = tumor mutation burden

**Supplemental Table 3: Characteristics of Nine Patients with Pancreatic Cancer Harboring SWI/SNF Complex Alterations Receiving Immunotherapy**

| Case # / Age/ Sex | Tissue NGS Vendor | Pertinent Tissue NGS Findings                                                                                                                                                                                       | TMB * | Mismatch Repair | Blood NGS Vendor | Pertinent Blood NGS Findings | Immune Vendor | PD-L1 ** | Immune Profile                          | # Prior Lines of Therapy | Prior Lines of Therapy                  | Immuno-therapy                                  | Best Respo nse | PFS (mont hs) | OS (mont hs) | Comment |
|-------------------|-------------------|---------------------------------------------------------------------------------------------------------------------------------------------------------------------------------------------------------------------|-------|-----------------|------------------|------------------------------|---------------|----------|-----------------------------------------|--------------------------|-----------------------------------------|-------------------------------------------------|----------------|---------------|--------------|---------|
| #1<br>79 M        | Caris             | <b>ARID1A</b> G276fs, FBXW2 R465H, FGFR3 R248C, KMT2D R2830X, PIK3CA E81K, <b>SMARCA4</b> T910M, <b>SMARCB1</b> R377C, ATM Exon 7, ATM Exon 10, ATM Exon 63, FGFR3 Exon 7, TSC1 Exon 15 P603fs, MSH2 R383X          | 58    | Deficient       | ND               | ND                           | Caris         | Low      | ND                                      | 1                        | FOLFIRINOX                              | Pembrolizumab                                   | CR             | 15            | 15           | -       |
| #2<br>60 F        | Paradigm          | <b>ARID1A</b> E2033, CCNE1 Gain, KRAS G12V, TP53 R156P                                                                                                                                                              | 8     | Proficient      | Guardant         | TP53 R156P, KRAS G12V        | Paradigm      | Low      | ND                                      | 2                        | FOLFOX gemcitabine + nab-paclitaxel     | Pembrolizumab + Trametinib                      | PR             | 4             | 4            | -       |
|                   | Tempus            | <b>ARID1A</b> E2250, TP53 R156P, KRAS G12V, CDKN2A copy number loss                                                                                                                                                 | 3.3   | Proficient      | Tempus           | KRAS G12V, TP53              |               |          |                                         |                          |                                         |                                                 |                |               |              |         |
| #3<br>47 F        | Caris             | CREBBPP Exon 16 E1058fs, <b>PBRM1</b> Exon 12 Y417fs, VTCN1/                                                                                                                                                        | 7     | Proficient      | Guardant         | CDK6 F164F                   | Caris         | Low      | TILs moderately inflamed PD-1 Very High | 2                        | FOLFIRINOX Gemcitabine + nab-paclitaxel | Pembrolizumab plus nab-paclitaxel + gemcitabine | PR             | 11            | 21+***       | -       |
|                   | Ashion            | NRG1 Fusion                                                                                                                                                                                                         | 2     | Proficient      |                  |                              | Omnise q      | Low      |                                         |                          |                                         |                                                 |                |               |              |         |
| #4<br>70 F        | Foundat ion       | <b>SMARCA4</b> R1135W, ERBB3 G284R, CDKN2A R80, DNMT3A G543A, TP53 R273C, KRAS G12V, CDKN2A R58, FBXW7 R505C, MSH6 2521delA                                                                                         | ND    | Deficient       | ND               | ND                           | Omnise q      | Int.     | TILs 10% - 20%                          | 1                        | FOLFIRINOX                              | Durvalumab based therapy                        | PR             | 36+           | 36+          | -       |
| #5<br>68 F        | Tempus            | <b>ARID1A</b> M835fs, KRAS G12D, MEN1 R516fs, KMT2C K2797fs, NBN R466fs, FAT1 F3952fs, POT1 39-2A>G, KMT2D P647fs, SLIT2 N155fs, KMT2D E5011, SMAD2 R427, <b>ARID1B</b> R1944, RPL5 D59fs, RAD50 E723fs, MSH2 N84fs | 23.8  | Deficient       | Guardant         | Negative                     | ND            | ND       | ND                                      | 1                        | FOLFIRINOX                              | Pembrolizumab                                   | PR             | 9+            | 9+           | -       |

| Case # / Age/ Sex | Tissue NGS Vendor | Pertinent Tissue NGS Findings                                                                                                                                                                                                                                               | TMB * | Mismatch Repair | Blood NGS Vendor | Pertinent Blood NGS Findings                                          | Immune Vendor | PD-L1 ** | Immune Profile                                   | # Prior Lines of Therapy | Prior Lines of Therapy                          | Immuno-therapy                           | Best Response | PFS (months) | OS (months) | Comment                                                                         |
|-------------------|-------------------|-----------------------------------------------------------------------------------------------------------------------------------------------------------------------------------------------------------------------------------------------------------------------------|-------|-----------------|------------------|-----------------------------------------------------------------------|---------------|----------|--------------------------------------------------|--------------------------|-------------------------------------------------|------------------------------------------|---------------|--------------|-------------|---------------------------------------------------------------------------------|
| #6<br>66 M        | Foundation        | <b>ARID1B</b> A757T, <b>SMARCA4</b> S312Y, ALK V564M, IRS2 N28_H29insN, MAGI2 E867K, MPL I492M, NOTCH1 G269R, TSC2 A460T, ERBB3 G337R, BRCA2 S1982fs, FBXW7 L700fs, AXIN 1 R533_H534insQVHH, BCORL1 splice site 4531_4618+102del190, EP300 E1492, KEP splice site 1532-2A>T | 11    | Proficient      | ND               | ND                                                                    | Caris         |          | PD-1 >5/HPF                                      | 1                        | FOLFOX                                          | Atezolizumab followed by pembrolizumab   | PR            | 33+          | 33+         | Switched from atezolizumab to pembrolizumab in setting of drug induced myositis |
|                   | Tempus            | BRCA2 51982fs, KEAP 1532-2A>T, EP300 E1492, NBN 5615fs, BCORL1 Y1585fsPD-L1 5%                                                                                                                                                                                              | 8.3   | Proficient      |                  |                                                                       | Paradigm      | Int.     | ND                                               |                          |                                                 |                                          |               |              |             |                                                                                 |
| #7<br>60 M        | Foundation        | <b>ARID1A</b> Q2039fs, EZR-ERBB4 fusion (E10-E18), PIK3CA R88Q                                                                                                                                                                                                              | 1     | Proficient      | Tempus           | Negative                                                              | Omniseq       | Low      | TILs Highly Inflamed CD8 Moderately Infiltrating | 1                        | FOLFIRINOX                                      | Nivolumab plus gemcitabine-based therapy | PR            | 7+           | 7+          | -                                                                               |
| #8<br>67 F        | Paradigm          | KRAS G12D, ERBB2, MGMT, TOP1                                                                                                                                                                                                                                                | 7     | Proficient      | Guardant         | Negative                                                              | Emerge        | Low      | TILs Negative PD-1 Negative                      | 4                        | Gemcitabine                                     | Pembrolizumab                            | IE            | 1            | 1           | Patient died secondary to irAE pneumonitis one month after starting I/O         |
|                   | Foundation        | <b>ARID1A</b> L2064fs, TP53 W53, KRAS G12D, ERBB2 R678Q                                                                                                                                                                                                                     |       |                 | Guardant         | KIT H894H                                                             |               |          |                                                  |                          | Capecitabine + radiation                        |                                          |               |              |             |                                                                                 |
|                   | Foundation        | <b>ARID1A</b> L2064fs, TP53 W53, KRAS G12D, ERBB2 R678Q, BRCA1 truncation intron 16, CDKN1B G97fs, CDKN2A/B loss                                                                                                                                                            |       |                 | Guardant         | TP53 W53, CCNE1 K209Q, KIT H894H                                      |               |          |                                                  |                          | Gemcitabine + Cisplatin<br>Cisplatin + Olaparib |                                          |               |              |             |                                                                                 |
| #9<br>67 F        | Foundation        | <b>ARID1A</b> H1843fs, BRCA1 truncation intron 16, KRAS G12V, CDKN2A/B loss, SMAD2 intron 5, TP53 T155N                                                                                                                                                                     | 0     | Proficient      | Guardant         | KRAS G12V, TP53 T155N, <b>ARID1A H1843fs</b>                          | Omniseq       | Low      | CD8 Minimally Infiltrating, TMB 4.3 mut/Mb, pMMR | 3                        | S-1                                             | Pembrolizumab                            | PR            | 3            | 3           | -                                                                               |
|                   |                   |                                                                                                                                                                                                                                                                             |       |                 | Foundation       | KRAS G12V, TP53 T155N                                                 |               |          |                                                  |                          | Olaparib                                        |                                          |               |              |             |                                                                                 |
|                   |                   |                                                                                                                                                                                                                                                                             |       |                 | Guardant         | KRAS G12V, TP53 T155N, <b>ARID1A H1843fs</b> , TP53 T256P, TP53 L265P |               |          |                                                  |                          | FOLFIRINOX                                      |                                          |               |              |             |                                                                                 |

\* = mutations per megabase (mut/Mb)

\*\* = stratified on the scale: low (0-1%), intermediate (2-49%), high (50%+) using the Dako 22C3 pharmDx qualitative immunohistochemical assay of tumor cells(38).

\*\*\* = "+" means ongoing response

**Abbreviations:** CR = Complete Response; dMMR = deficient mismatch repair; F = female; HPF = high powered field; IE = Inevaluable; Int. = Intermediate; I/O = Immunotherapy; irAE = immune related adverse event; M = male; ND = Not done; NGS = next generation sequencing; OS = median overall survival; PD-1 = Programmed death receptor-1; PFS = Median Progression Free Survival; pMMR = proficient mismatch repair; PR = partial response; S-1 = tegafur, gimeracil, oteracil; SD = stable disease; TILs = tumor infiltrating leukocytes; TMB = tumor mutation burden

### Supplemental Figure 1. Overall Survival of SWI/SNF Complex Altered versus Wild-type in Pancreatic Cancer.

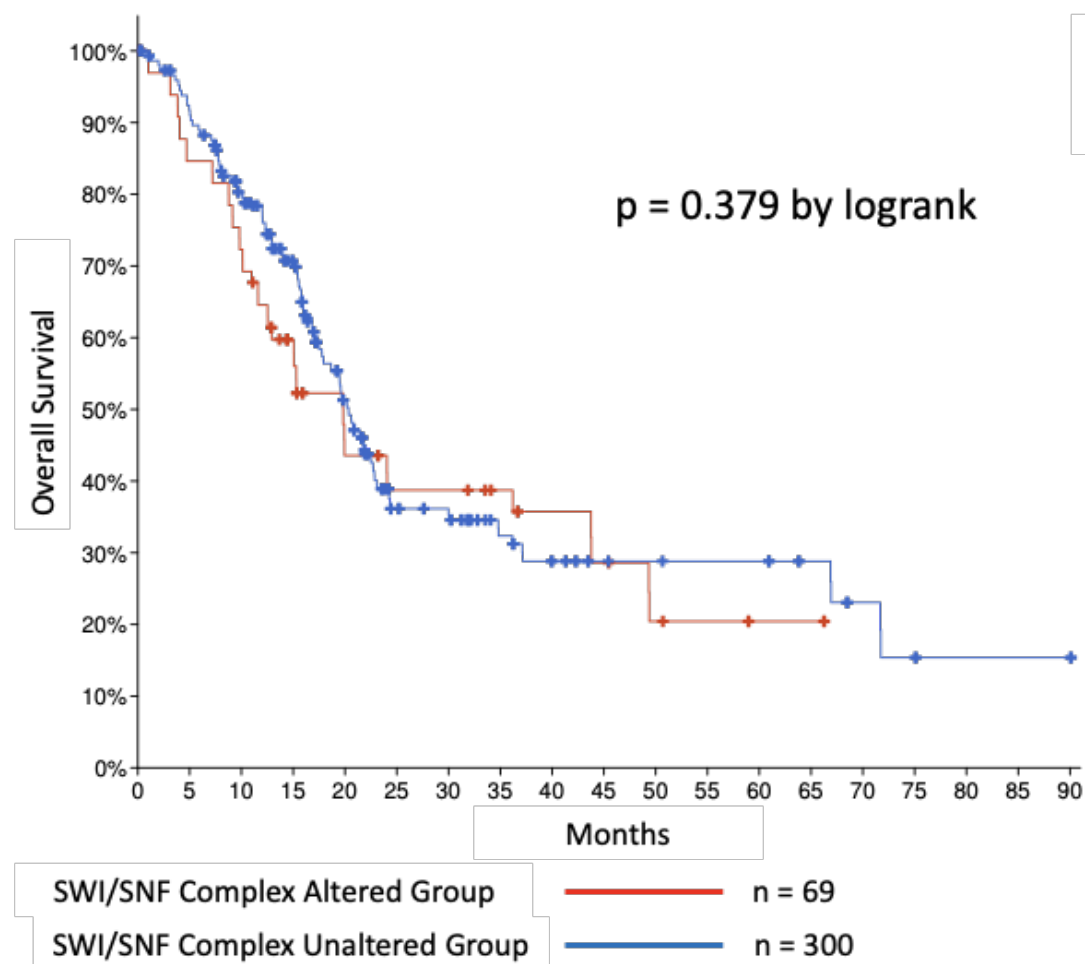

### Supplemental Figure 1. Overall Survival of SWI/SNF Complex Altered versus Wild-type in Pancreatic Cancer.

The cBioPortal for Cancer Genomics was used to query patients from 5 pancreatic carcinoma genomic datasets (ICGC, Nature 2012; QCMG, Nature 2016; TCGA, Firehose Legacy; TCGA, PanCancer Atlas; UTSW, Nat Commun 2015). Red line = altered SWI/SNF complex gene as specified. Blue line = unaltered SWI/SNF complex gene. Genes examined include *ARID1A*, *ARID1B*, *ARID2*, *SMARCA2*, *SMARCA4*, *SMARCB1*, *SMARCC1*, *SMARCC2*, *SMARCD1-3*, *SMARCE1*, and *PBRM1*. SWI/SNF-altered versus wild-type pancreatic cancer had no difference in survival ( $p = 0.379$ ).
